# Supplementary material for: Mitochondrial DNA Survey Reveals the Lack of Accuracy in Maremmano Horse Studbook Records
Source: Animals (Basel). 2020 May 12;10(5):839. doi: 10.3390/ani10050839 (PMC7278429; doi:10.3390/ani10050839)
Supplement: Supplementary file 1 [file animals-10-00839-s001.xlsx]

## Sheet: Table S1
	Table S1. List of 92 Maremmano horse samples here analysed.
	Maternal line	Paternal line	Sex	Sample ID	Region of provenience
	ADUA III	AIACE	F	MA277	Tuscany
			F	MA296
	AFRA	OTELLO	F	MA386	Tuscany
	ALAMBRA	AIACE	M	MA499	Liguria
	ALBA	AIACE	M	MA260	Tuscany
	ANOTHER DELIGHT	USSERO	F	MA292	Tuscany
	ARPA 3	USSERO	F	MA064	Latium
			M	MA127
	ASTRA	AIACE	F	MA484	Tuscany
	BAITTA	INGRES	F	MA564	Tuscany
	BALILLA	OTELLO	F	MA302	Tuscany
		INGRES	M	MA688
	BANDIERA	AIACE	F	MA263	Liguria
	BERTA	AIACE	F	MA301	Emilia-Romagna
	BIANCA	AIACE	F	MA470	Latium
	BIONDA	AIACE	F	MA380	Latium
	BLANCA(Lipizzan)	AIACE	M	MA055	Tuscany
	BRUTTA	AIACE	M	MAC2	Emilia-Romagna
	CANDELARIA	OTELLO	F	MA119	Emilia-Romagna
	CARMELA	USSERO	F	MA095	Latium
		OTELLO	F	MA468
			M	MA694
	CECILIA	AIACE	F	MA259	Emilia-Romagna
			M	MA690	Tuscany
	DIANNA	USSERO	F	MA527	Tuscany
	DORA	OTELLO	F	MA698	Latium
	DORA (129)	AIACE	M	MA116	Latium
	DORA I	OTELLO	F	MA166	Latium
	ETRUSCA	AIACE	F	MA188	Tuscany
	FARFALLA	INGRES	F	MA364	Latium
	FARFALLA IV	OTELLO	M	MA478	Tuscany
	FIORELLA	OTELLO	F	MA142	Tuscany
			F	MA657
			M	MAO22
		INGRES	M	MA697
		AIACE	F	MA703
	FORESTA	AIACE	F	MA014	Tuscany
	FORTUNELLA	INGRES	F	MA032	Tuscany
	FRAOLINA	OTELLO	M	MAO26	Latium
	FRECCIA	AIACE	F	MA339	Tuscany
	FRECCIA ROSSA	OTELLO	F	MA530	Tuscany
	FRIDA	OTELLO	M	MAC5	Latium
	FURIA	AIACE	M	MA049	Tuscany
	GERMANA	OTELLO	M	MA004	Tuscany
			F	MA076
		AIACE	F	MA109
			F	MA112
	GIULIA	AIACE	M	MA366	Latium
		OTELLO	F	MA419
	ILONA	AIACE	M	MA221	Latium
	LETIZIA	OTELLO	F	MA227	Umbria
	LOLA (358)	OTELLO	F	MA159	Tuscany
	LOLA (612)	USSERO	M	MA365	Tuscany
	MARCELLA	AIACE	M	MAO07	Latium
	MORA (1024)	AIACE	F	MA137	Tuscany
	MORA (3484)	OTELLO	F	MA490	Tuscany
		AIACE	M	MA693_2019
	MORA (71)	OTELLO	F	MA529	Tuscany
	MORA III	OTELLO	F	MA576	Latium
	MOSCA	AIACE	M	MAO24	Tuscany
	NADIA	AIACE	F	MA566	Tuscany
	NINFA	OTELLO	F	MA262	Tuscany
	NIZZA I	OTELLO	M	MA128	Umbria
			M	MA695	Liguria
	NOVELLA	AIACE	F	MA146	Latium
	OFELIA	OTELLO	M	MA528	Tuscany
	OLBIA	AIACE	F	MA268	Tuscany
	OLONA	AIACE	M	MA067	Tuscany
	ORTENZIA	OTELLO	F	MA512	Tuscany
	PATRIZIA	OTELLO	F	MA324	Umbria
	PERLINA	OTELLO	F	MA321	Tuscany
	POLVERINA	AIACE	M	MAC3	Tuscany
	POMPOSINA	AIACE	F	MA150	Latium
		OTELLO	M	MA632
	RAMPICHINA	OTELLO	M	MAO58	Tuscany
	ROMANA	OTELLO	F	MA567	Latium
	RONDINELLA	AIACE	F	MA359	Latium
	ROSA	OTELLO	F	MA100	Tuscany
	ROSINA II	AIACE	F	MA398	Tuscany
	SABRINA	OTELLO	M	MA192	Tuscany
	SAETTA	OTELLO	F	MA381	Latium
	SARA	USSERO	F	MA375	Latium
	SCALA I	OTELLO	F	MA334	Tuscany
	SELVA	INGRES	F	MA212	Latium
	SERENELLA	OTELLO	M	MA060	Tuscany
	SERPENTINA	AIACE	M	MAO87	Latium
	STELLA	AIACE	M	MAC7	Tuscany
	STELLINA	OTELLO	F	MA164	Umbria
	VELIA	AIACE	F	MA013	Latium
			F	MA439
	ZAIRA	USSERO	F	MA511	Tuscany
	ZINGARA	AIACE	F	MA515	Tuscany

## Sheet: Table S2
	Table S2. Control-region haplotypes of 74 Maremmano dam lines here considered (nucleotide position range: 15,491-16,100).
	Maternal line	mtDNA control region Haplotype	mtDNA Haplogroup	Sample ID	Reference
	ADUA III	15495 15542 15585 15597 15602 15635 15650 15666 15703 15720 15870 16007 16031	G	MA277	This study
				MA296	Cardinali et al. 2016
	AFRA	15495 15542 15597 15602 15635 15666 15703 15720 15870 16080	G	MA386	Cardinali et al. 2016
	ALAMBRA	15495 15585 15601 15602 15720 15771 15806 15827 15838 15869 15956 16007 16068	N	MA499	Cardinali et al. 2016
	ALBA	15495 15585 15650 15666 15720 15810 15826 16055	B	MA260	Cardinali et al. 2016
	ANOTHER DELIGHT	15495 15542 15597 15602 15635 15650 15666 15703 15720 15870	G	MA292	Cardinali et al. 2016
	ARPA 3	15495 15585 15602 15604 15703 15720 15740 15771 15777 15811 15956 16035 16037 16038 16057 16063insC	Q	MA064	Cardinali et al. 2016
				MA127
	ASTRA	15495 15542 15602 15619 15635 15650 15666 15703 15720 15870	G	MA484	Cardinali et al. 2016
	BAITTA	15494 15495 15496 15534 15585 15602 15603 15604 15649 15720 15771 15870 15871 15956 15974 16068	L	MA564	Cardinali et al. 2016
	BALILLA	15495 15585 15650 15666 15720 15810 15826 16055	B	MA302	Cardinali et al. 2016
				MA688
	BANDIERA	15495 15598 15602 15615 15616 15659 15703 15720 15770 15775 15776 15806 15827 15956 15974 15996	R	MA263	Cardinali et al. 2016
	BERTA	15495 15542 15585 15597 15602 15635 15650 15666 15703 15720 15870 16031	G	MA301	Cardinali et al. 2016
	BIANCA	15494 15495 15496 15534 15602 15603 15649 15720 15771 15811 15870 15871 15956 15974 16068	L	MA470	Cardinali et al. 2016
	BIONDA	15495 15597 15602 15650 15651 15720 15826 15870 15956 15974	C	MA380	Cardinali et al. 2016
	BLANCA (Lipizzan)	15495 15585 15602 15720 15826 15870 15956 15974	C	MA055	Cardinali et al. 2016
	BRUTTA	15495 15826	A	MAC2	Cardinali et al. 2016
	CANDELARIA	15495 15602 15617 15659 15720 15771 15806 15827 15869 15956 16068 16080	M	MA119	Cardinali et al. 2016
	CARMELA	15495 15650 15666 15720 15826 16055	B	MA095	Cardinali et al. 2016
				MA468
				MA694
	CECILIA	15495 15597 15602 15667 15703 15718 15720 15771 15777 15809 15956 16038 16063insC	P	MA259	Cardinali et al. 2016
				MA690
	DIANNA	15495 15585 15650 15666 15720 15826 16055	B	MA527	Cardinali et al. 2016
	DORA	15494 15495 15496 15534 15574 15585 15602 15603 15604 15649 15720 15771 15870 15871 15956 15974 16068	L	MA698	Cardinali et al. 2016
	DORA (129)	15494 15495 15496 15534 15574 15585 15602 15603 15604 15649 15720 15771 15870 15871 15956 15974 16068	L	MA116	Cardinali et al. 2016
	DORA I	15495 15526 15540 15585 15602 15649 15718 15720 15771 15806 15870 15974 16081	H	MA166	Cardinali et al. 2016
	ETRUSCA	15495 15602 15617 15659 15720 15771 15806 15827 15869 15956 16068 16080	M	MA188	Cardinali et al. 2016
	FARFALLA	15495 15585 15650 15666 15720 15810 15826 16055	B	MA364	Cardinali et al. 2034
	FARFALLA IV	15494 15495 15496 15534 15585 15602 15603 15649 15720 15771 15870 15871 15956 15974 16068	L	MA478	Cardinali et al. 2035
	FIORELLA	15495 15538 15585 15602 15650 15709 15720 15771 15826 15870 15974	I	MA142	Cardinali et al. 2016
				MA703
		15494 15495 15534 15585 15602 15603 15649 15720 15771 15870 15871 15956 15974 16068	L	MA657
				MA697
		15494 15495 15496 15534 15585 15603 15649 15720 15740 15771 15870 15871 15956 15974 16068	L	MAO22
	FORESTA	15495 15538 15584 15585 15602 15709 15720 15771 15974	I	MA014	Cardinali et al. 2016
	FORTUNELLA	15494 15495 15496 15534 15585 15603 15649 15720 15771 15870 15871 15956 15974 16068	L	MA032	Cardinali et al. 2016
	FRAOLINA	15495 15585 15601 15602 15720 15771 15806 15827 15838 15869 15956 16007 16068	N	MAO26	Cardinali et al. 2016
	FRECCIA	15495 15826	A	MA339	Cardinali et al. 2016
	FRECCIA ROSSA	15494 15495 15496 15534 15585 15602 15603 15649 15720 15771 15870 15871 15956 15974 16068	L	MA530	Cardinali et al. 2016
	FRIDA	15494 15495 15496 15534 15602 15603 15649 15720 15771 15811 15870 15871 15956 15974 16068	L	MAC5	Cardinali et al. 2016
	FURIA	15495 15585 15650 15666 15720 15810 15826 16055	B	MA049	Cardinali et al. 2016
	GERMANA	15494 15495 15496 15534 15585 15603 15649 15720 15771 15870 15871 15956 15974 16068	L	MA004	Cardinali et al. 2016
				MA076
				MA109
				MA112
	GIULIA	15495 15826	A	MA366	Cardinali et al. 2016
				MA419
	ILONA	15495 15602 15617 15659 15719 15720 15771 15806 15827 15869 15956 16068 16080	M	MA221	Cardinali et al. 2016
	LETIZIA	15495 15542 15597 15602 15635 15650 15666 15703 15720 15870	G	MA227	Cardinali et al. 2016
	LOLA (358)	15495 15542 15585 15597 15602 15650 15666 15720 15771 15870 15956 15974	E	MA159	Cardinali et al. 2016
	LOLA (612)	15495 15539 15542 15585 15602 15650 15666 15720 15771 15870 15956 15974	E	MA365	Cardinali et al. 2016
	MARCELLA	15495 15542 15585 15597 15602 15635 15650 15666 15703 15720 15870	G	MAO07	Cardinali et al. 2016
	MORA (1024)	15495 15602 15617 15659 15720 15771 15806 15827 15869 15956 16068 16080	M	MA137	Cardinali et al. 2016
	MORA (3484)	15495 15585 15597 15602 15635 15650 15703 15720 15771 15776 15870 15956 15996	G	MA490	This study
				MA693_2019
	MORA (71)	15495 15826	A	MA529	Cardinali et al. 2016
	MORA III	15495 15532delC 15585 15602 15604 15720 15771 15807 15827 15870 15871 16071	J	MA576	Cardinali et al. 2016
	MOSCA	15495 15585 15602 15617 15659 15720 15770 15771 15806 15827 15868 15869 15956 16007 16068 16080	M	MAO24	Cardinali et al. 2016
	NADIA	15495 15602 15604 15635 15667 15703 15720 15771 15777 15809 15956 16038 16063insG	O	MA566	Cardinali et al. 2016
	NINFA	15494 15495 15496 15534 15585 15603 15649 15685 15720 15771 15870 15871 15956 15974	L	MA262	Cardinali et al. 2016
	NIZZA I	15495 15542 15585 15597 15602 15635 15650 15666 15703 15720 15870 16031 16087	G	MA128	Cardinali et al. 2016
		15495 15521 15596 15602 15720 15737 15770 15810 15870 15984 16087	D	MA695
	NOVELLA	15494 15495 15496 15534 15585 15603 15604 15649 15720 15771 15870 15871 15956 15974 16068	L	MA146	Cardinali et al. 2016
	OFELIA	15495 15602 15617 15659 15720 15771 15806 15827 15869 15956 16068 16080	M	MA528	Cardinali et al. 2016
	OLBIA	15494 15495 15496 15534 15585 15603 15649 15685 15720 15771 15870 15871 15956 15974	L	MA268	Cardinali et al. 2016
	OLONA	15495 15585 15650 15666 15720 15810 15826 16055 16080	B	MA067	Cardinali et al. 2016
	ORTENZIA	15495 15597 15602 15667 15703 15720 15771 15777 15809 15956 16038 16063insC	P	MA512	Cardinali et al. 2016
	PATRIZIA	15495 15542 15585 15597 15602 15635 15650 15666 15703 15720 15870 16031 16087	G	MA324	Cardinali et al. 2016
	PERLINA	15495 15542 15585 15597 15600 15602 15635 15650 15666 15703 15720 15870 16031	G	MA321	Cardinali et al. 2016
	POLVERINA	15495 15602 15604 15703 15720 15726 15740 15771 15777 15811 15870 15956 16037 16038 16057 16063insC	Q	MAC3	Cardinali et al. 2016
	POMPOSINA	15495 15542 15585 15597 15602 15635 15650 15666 15703 15720 15870 16031 16087	G	MA150	Cardinali et al. 2016
		15495 15602 15617 15720 15771 15806 15827 15869 15956 16068 16080	M	MA632
	RAMPICHINA	15494 15495 15496 15534 15602 15603 15649 15720 15771 15870 15871 15956 15974 16068	L	MAO58	Cardinali et al. 2016
	ROMANA	15495 15585 15597 15602 15635 15650 15703 15720 15771 15776 15870 15956 15996	G	MA567	Cardinali et al. 2016
	RONDINELLA	15495 15602 15617 15659 15720 15771 15806 15810 15827 15869 15956 16068 16080	M	MA359	Cardinali et al. 2016
	ROSA	15495 15597 15602 15667 15703 15720 15771 15777 15809 15827 15956 16038 16063insC	P	MA100	Cardinali et al. 2016
	ROSINA II	15495 15538 15584 15585 15602 15709 15720 15771 15974	I	MA398	Cardinali et al. 2016
	SABRINA	15495 15602 15617 15659 15720 15771 15806 15827 15869 15956 16068 16080	M	MA192	Cardinali et al. 2016
	SAETTA	15495 15585 15650 15666 15720 15810 15826 16055 16080	B	MA381	Cardinali et al. 2016
	SARA	15495 15602 15604 15703 15720 15740 15771 15777 15811 15956 16037 16038 16057 16063 16063insC 16080	Q	MA375	Cardinali et al. 2016
	SCALA I	ERS	A	MA334	Cardinali et al. 2016
	SELVA	15495 15826	A	MA212	Cardinali et al. 2016
	SERENELLA	15495 15602 15617 15720 15771 15806 15827 15869 15956 16068 16080	M	MA060	Cardinali et al. 2016
	SERPENTINA	15495 15585 15650 15666 15720 15810 15826 16055	B	MAO87	Cardinali et al. 2016
	STELLA	15495 15542 15585 15597 15602 15635 15650 15666 15703 15720 15825 15870 16031 16087	G	MAC7	Cardinali et al. 2016
	STELLINA	15495 15542 15585 15597 15602 15650 15666 15720 15771 15870 15956 15974	E	MA164	Cardinali et al. 2016
	VELIA	15495 15602 15617 15659 15720 15771 15806 15827 15869 15956 16068 16080	M	MA013	Cardinali et al. 2016
				MA439
	ZAIRA	15495 15626 15650 15666 15720 15810 15826 16055	B	MA511	Cardinali et al. 2016
	ZINGARA	15495 15602 15604 15659 15703 15720 15726 15740 15771 15777 15811 15956 16037 16038 16057 16063insC	Q	MA515	Cardinali et al. 2016

## Sheet: Table S3
	Table S3. Frequencies (%) of mtDNA haplogroups identified in the 74 Maremmano maternal lines. The lineages (Fiorella, Nizza I and Pomposina) not confirmed by the comparison between pedigree and mtDNA data were excluded from the table.
	Haplogroup/Dam line	Frequency
	A	7.61
	BRUTTA	1.09
	FRECCIA	1.09
	GIULIA	2.17
	MORA (71)	1.09
	SCALA I	1.09
	SELVA	1.09
	B	14.13
	ALBA	1.09
	BALILLA	2.17
	CARMELA	3.26
	DIANNA	1.09
	FARFALLA	1.09
	FURIA	1.09
	OLONA	1.09
	SAETTA	1.09
	SERPENTINA	1.09
	ZAIRA	1.09
	C	2.17
	BIONDA	1.09
	BLANCA (Lipizzan)	1.09
	E	3.26
	LOLA (358)	1.09
	LOLA (612)	1.09
	STELLINA	1.09
	G	17.39
	ADUA III	2.17
	AFRA	1.09
	ANOTHER DELIGHT	1.09
	ASTRA	1.09
	BERTA	1.09
	LETIZIA	1.09
	MARCELLA	1.09
	MORA (3484)	2.17
	PATRIZIA	1.09
	PERLINA	1.09
	ROMANA	1.09
	STELLA	1.09
	H	1.09
	DORA I	1.09
	I	4.35
	FORESTA	1.09
	ROSINA II	1.09
	J	1.09
	MORA III	1.09
	L	20.65
	BAITTA	1.09
	BIANCA	1.09
	DORA	1.09
	DORA (129)	1.09
	FARFALLA IV	1.09
	FORTUNELLA	1.09
	FRECCIA ROSSA	1.09
	FRIDA	1.09
	GERMANA	4.35
	NINFA	1.09
	NOVELLA	1.09
	OLBIA	1.09
	RAMPICHINA	1.09
	M	13.04
	CANDELARIA	1.09
	ETRUSCA	1.09
	ILONA	1.09
	MORA (1024)	1.09
	MOSCA	1.09
	OFELIA	1.09
	RONDINELLA	1.09
	SABRINA	1.09
	SERENELLA	1.09
	VELIA	2.17
	N	2.17
	ALAMBRA	1.09
	FRAOLINA	1.09
	O	1.09
	NADIA	1.09
	P	4.35
	CECILIA	2.17
	ORTENZIA	1.09
	ROSA	1.09
	Q	5.43
	ARPA 3	2.17
	POLVERINA	1.09
	SARA	1.09
	ZINGARA	1.09
	R	1.09
	BANDIERA	1.09
